# Supplementary material for: Dystonia type 6 gene product Thap1: identification of a 50 kDa DNA-binding species in neuronal nuclear fractions
Source: Springer Nature journal article supplement (doi:10.1186/s40478-014-0139-1), 2014-09-17
Supplement: MOESM8 [file 25658258]

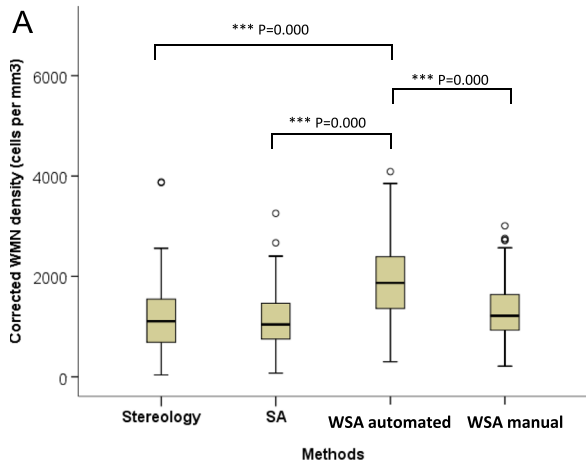

| Methods              | n   | Cells per mm <sup>2</sup> |           | Cells per mm <sup>3</sup> |            |
|----------------------|-----|---------------------------|-----------|---------------------------|------------|
|                      |     | Average ± SE              | Max - Min | Average ± SE              | Max - Min  |
| <b>Stereology</b>    | 50  | 15 ± 3                    | 42 - 1    | 1206 ± 117                | 3882 - 38  |
| <b>SA</b>            | 142 | 39 ± 2                    | 132 - 3   | 1150 ± 49                 | 4358 - 73  |
| <b>WSA automated</b> | 142 | 65 ± 2                    | 153 - 9   | 1941 ± 68                 | 6003 - 301 |
| <b>WSA manual</b>    | 142 | 44 ± 2                    | 118 - 5   | 1322 ± 53                 | 4615 - 215 |

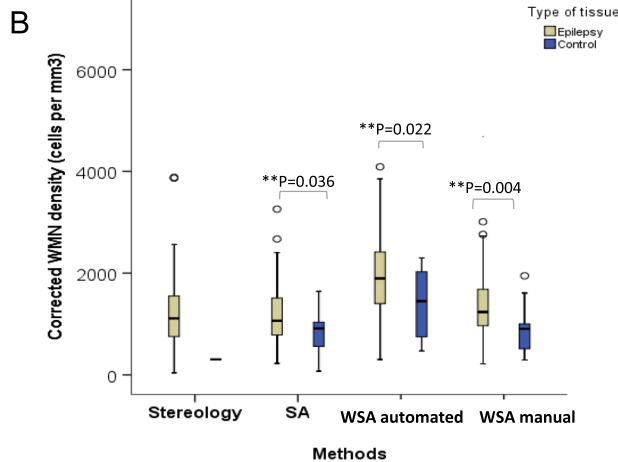

| Methods              | n   | Cells per mm <sup>2</sup> |           | Cells per mm <sup>3</sup> |                        |
|----------------------|-----|---------------------------|-----------|---------------------------|------------------------|
|                      |     | Average ± SE              | Max - Min | Average ± SE              | Max - Min              |
| <b>Stereology</b>    |     |                           |           |                           |                        |
| Control              | 1   | 10                        | 10        | 303                       | 303                    |
| Epilepsy             | 49  | 15 ± 3                    | 42 - 1    | 1224 ± 118                | 3882 - 39 <sup>^</sup> |
| <b>SA</b>            |     |                           |           |                           |                        |
| Control (all)        | 12  | 28 ± 4                    | 63 - 3    | 831 ± 119                 | 1639 - 73              |
| Surgical             | 7   | 34                        | 63 - 17   | 1009                      | 1639 - 568             |
| PM                   | 5   | 19                        | 31 - 3    | 583                       | 929 - 73               |
| Epilepsy             | 130 | 40 ± 2                    | 132 - 5   | 1180 ± 51                 | 4358 - 225             |
| <b>WSA automated</b> |     |                           |           |                           |                        |
| Control (all)        | 12  | 47 ± 7                    | 84 - 14   | 1399 ± 194                | 2298 - 467             |
| Surgical             | 7   | 52                        | 84 - 14   | 1561                      | 2298 - 467             |
| PM                   | 5   | 40                        | 62 - 16   | 1173                      | 2009 - 481             |
| Epilepsy             | 130 | 66 ± 2                    | 153 - 9   | 1991 ± 71                 | 6003 - 301             |
| <b>WSA manual</b>    |     |                           |           |                           |                        |
| Control (all)        | 12  | 30 ± 6                    | 74 - 9    | 883 ± 143                 | 1947 - 291             |
| Surgical             | 7   | 34                        | 74 - 9    | 998                       | 1947 - 291             |
| PM                   | 5   | 25                        | 40 - 11   | 722                       | 1026 - 299             |
| Epilepsy             | 130 | 46 ± 2                    | 118 - 5   | 1362 ± 55                 | 4615 - 215             |
